# Supplementary material for: Macrophage migration inhibitory factor facilitates prostaglandin E2 production of astrocytes to tune inflammatory milieu following spinal cord injury
Source: PubMed Central journal article supplement (PMC6461812; doi:10.1186/s12974-019-1468-6), 2019-04-13
Supplement: 12974_2019_1468_MOESM1_ESM.pdf [file 12974_2019_1468_MOESM1_ESM.pdf]

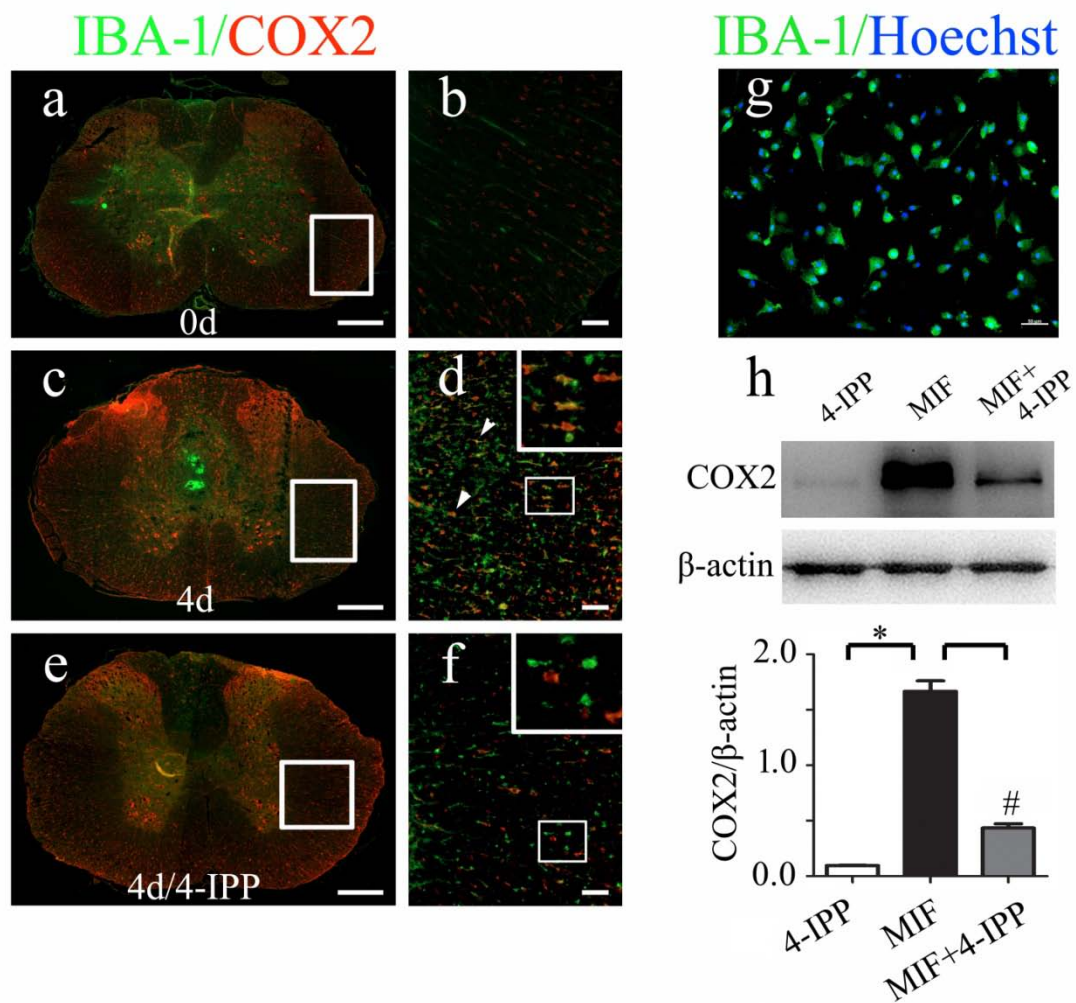

**Fig.1** Colocalization of COX2 with IBA-1-positive microglia following spinal cord contusion at 0d and 4d with or without treatment of 4-IPP, as well as examination of 4-IPP effects on COX2 expression. Rectangle indicates region magnified. Arrowheads indicate colocalization of COX2 with astrocytes. Scale bars, 500  $\mu$ m in (a), (c) and (e); 50  $\mu$ m in (b), (d), (f) and (g). Error bars represent the standard deviation (\* $P < 0.05$ ; # $P < 0.05$ ).
